# Supplementary material
Source: Springer Nature journal article supplement (https://www.springermedizin.de/resource/supplementary/12895_2011_118_MOESM1_ESM.pdf/9514140)

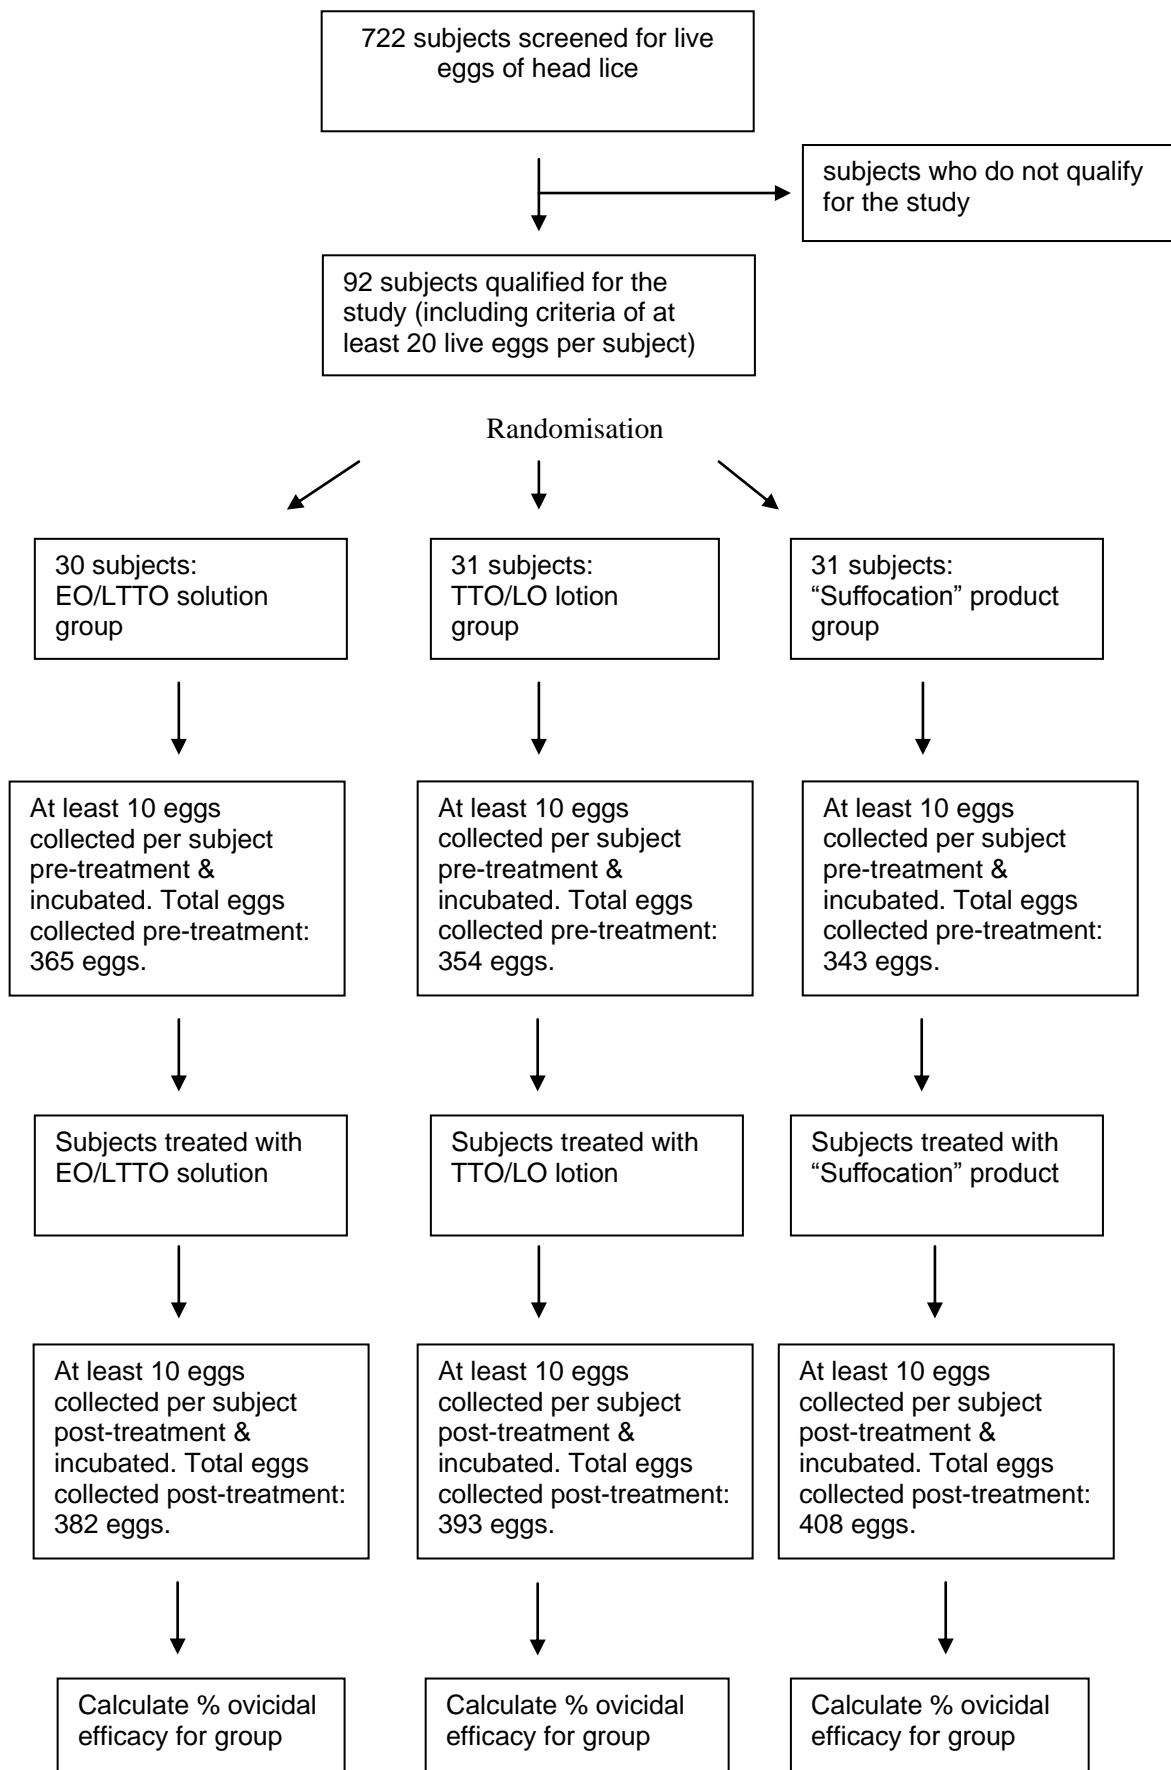

Supplement: MOESM1 [file 9514140]
